# Supplementary material for: Results and conclusions of the European Intergroup EURO-LB02 trial in children and adolescents with lymphoblastic lymphoma
Source: PubMed Central journal article supplement — Haematologica. 2017 Oct 5;102(12):2086–96. doi: 10.3324/haematol.2015.139162 (PMC5709108; doi:10.3324/haematol.2015.139162), 2017-12
Supplement: 2015.139162.LANDMANN_SUPPL.pdf [file 2015.139162.LANDMANN_SUPPL.pdf]

## Results and conclusions of the European Intergroup EURO-LB02 trial in children and adolescents with lymphoblastic lymphoma

Eva Landmann,<sup>1\*</sup> Birgit Burkhardt,<sup>2\*</sup> Martin Zimmermann,<sup>3</sup> Ulrike Meyer,<sup>1</sup> Wilhelm Woessmann,<sup>1</sup> Wolfram Klapper,<sup>4</sup> Grazyna Wrobel,<sup>5</sup> Angelo Rosolen,<sup>6</sup> Marta Pillon,<sup>6</sup> Gabriele Escherich,<sup>7</sup> Andishe Attarbaschi,<sup>8</sup> Auke Beishuizen,<sup>9</sup> Karin Mellgren,<sup>10</sup> Robert Wynn,<sup>11</sup> Richard Ratei,<sup>12</sup> Adriana Plesa,<sup>13</sup> Martin Schrappe,<sup>14</sup> Alfred Reiter,<sup>1</sup> Christophe Bergeron,<sup>15</sup> Catherine Patte<sup>16</sup> and Yves Bertrand<sup>15</sup>

<sup>1</sup>Department of Pediatric Hematology and Oncology, Justus-Liebig-University, Giessen, Germany; <sup>2</sup>Department of Pediatric Hematology and Oncology, Children's University Hospital, Münster, Germany; <sup>3</sup>Department of Pediatric Hematology and Oncology, Hannover Medical School, Germany; <sup>4</sup>Department of Hematopathology and Lymph Node Registry, University Hospital, Kiel, Germany; <sup>5</sup>Department of Bone Marrow Transplantation, Children's Oncology and Hematology, Wrocław Medical University, Poland; <sup>6</sup>Clinica di Oncoematologia Pediatrica, Università di Padova, Italy; <sup>7</sup>Clinic for Pediatric Hematology and Oncology, University Medical Center, Hamburg, Germany; <sup>8</sup>Department of Pediatric Hematology and Oncology, St. Anna Children's Hospital, Medical University of Vienna, Austria; <sup>9</sup>Department of Pediatric Hematology/Oncology, Erasmus MC - Sophia Children's Hospital, Rotterdam, the Netherlands and the Dutch Childhood Oncology Group, the Hague, the Netherlands; <sup>10</sup>Department of Pediatric Oncology and Hematology, The Queen Silvia Children's Hospital, Göteborg, Sweden; <sup>11</sup>Central Manchester University Hospitals, Great Britain; <sup>12</sup>Department of Hematology, Oncology and Tumor Immunology, Helios Klinikum, Berlin-Buch, Germany; <sup>13</sup>Department of Hematopathology and Flow Cytometry, CHU, Lyon-HCL, France; <sup>14</sup>Department of Pediatrics, Christian-Albrechts-University, Kiel, Germany; <sup>15</sup>Institut d'Hématologie et d'Oncologie Pédiatrique, Centre Léon Bérard and HCL, Claude Bernard University, Lyon, France and <sup>16</sup>Department of Gustave Roussy, Villejuif, France

*\*EL and BB contributed equally to this work.*

©2017 Ferrata Storti Foundation. This is an open-access paper. doi:10.3324/haematol.2015.139162

Received: December 1, 2015.

Accepted: September 28, 2017.

Pre-published: October 5, 2017.

Correspondence: birgit.burkhardt@ukmuenster.de

*Online supplements*

**Supplement 1: Study group members**

**Local investigators and centers participating in the study**

**Austria (BFM):** C. Urban, Universitätsklinik für Kinder- und Jugendheilkunde, Graz; B.

Meister, Pädiatrische Hämatologie, Onkologie und Stammzelltransplantation,

Universitätskliniken LKH, Innsbruck; W. Kaulfersch, Abteilung für Kinder- und

Jugendheilkunde, Klinikum, Klagenfurt; R. Kerbl, Klinik für Kinder und Jugendliche, LKH,

Leoben; K. Schmitt, Landes-Frauen- und Kinderklinik, Linz; W. Sperl, Universitätsklinik für

Kinder- und Jugendheilkunde, Salzburg; H. Gadner, St. Anna Kinderspital, Wien

**Czechia (BFM):** J. Sterba, Department of Pediatric Oncology, University Hospital, Brno; E.

Kabícková, Department of Pediatric Hematology/Oncology, University Hospital Motol, Praha

**Germany (BFM):** A. Gnekow, I. Klinik für Kinder und Jugendliche, Klinikum, Augsburg; G.

Henze, Abt. Hämatologie/Onkologie, Charite Campus Virchow-Klinikum, Berlin; W. Dörffel,

Kinderklinik, HELIOS Klinikum, Berlin-Buch; U. Bode, Abt. Pädiatrische

Hämatologie/Onkologie, Universitätsklinikum, Bonn; K. Hofmann, Klinik für Kinder- und

Jugendmedizin, Klinikum Chemnitz gGmbH, Chemnitz; T. Wiesel, Vestische Kinderklinik,

Datteln; H. Breu, Klinik für Kinder- und Jugendmedizin, Klinikum Dortmund gGmbH,

Dortmund; M. Suttorp, Klinik für Kinder- und Jugendmedizin, Universitätsklinik Carl Gustav

Carus, Dresden; A. Sauerbrey, Klinik für Kinder- und Jugendmedizin, HELIOS Klinikum

Erfurt GmbH, Erfurt; W. Holter, Klinik für Kinder- und Jugendmedizin,

Universitätsklinikum, Erlangen; B. Kremens, Pädiatrische Hämatologie/Onkologie,

Universitätsklinikum Essen, Essen; T. Klingebiel, Klinik für Pädiatrische Hämatologie und

Onkologie, Universitätsklinikum, Frankfurt; C. Niemeyer, Pädiatrische Hämato- und

Onkologie, Universitätsklinikum, Freiburg; Prof. A. Reiter, Pädiatrische Hämato- und

Onkologie, Justus-Liebig-Universität, Gießen; L. Schweigerer, Pädiatrische Hämato- und

Onkologie, Universitäts-Kinderklinik, Göttingen; S. Burdach, Klinik für Kinder- und

Jugendmedizin, Universitätsklinikum, Halle; K. Welte, Pädiatrische Hämatologie und Onkologie, Medizinische Hochschule, Hannover; A. Kulozik, Klinik für Kinderheilkunde III, Onkologie, Hämatologie, Immunologie und Pneumologie, Universitätsklinikum, Heidelberg; Ch. Tautz, Pädiatrische Hämatologie/Onkologie, Gemeinschaftskrankenhaus, Herdecke; N. Graf, Pädiatrische Hämatologie und Onkologie, Universitätsklinikum, Homburg; F. Zintl./J. Beck, Klinik für Kinder- und Jugendmedizin, Universitätsklinikum, Jena; Dr. Germann, Kinderklinik, Städt. Klinikum Karlsruhe gGmbH, Karlsruhe; M. Natrath/M. Rodehüser, Klinik für Pädiatrische Hämato- und Onkologie, Klinikum, Kassel; M. Schrappe, Klinik für Allgemeine Pädiatrie, Univ.-Klinikum Schleswig Holstein, Campus Kiel; R. Ferrari, Klinik für Kinder- und Jugendmedizin, Städtisches Krankenhaus Kemperhof, Koblenz; F. Berthold, Klinik für Kinder- und Jugendmedizin, Universitätsklinikum, Köln; W. Sternschulte, Städtisches Kinderkrankenhaus, Köln; U. Mittler, Pädiatrische Hämatologie/Onkologie, Universitätsklinikum, Magdeburg; H. Christiansen, Zentrum Kinder- und Jugendmedizin, Universitätsklinikum, Marburg; H. Jürgens, Pädiatrische Hämatologie und Onkologie, Universitätsklinikum, Münster; W. Scheuerlen, Cnopf'sche Kinderklinik, Nürnberg; H. Müller, Zentrum für Kinder- und Jugendmedizin, Oldenburg; G. Eggers, Kinder- und Jugendklinik, Universität, Rostock; Dr. Clemens, Klinik für Kinder- und Jugendmedizin, HELIOS Kliniken Schwerin GmbH, Schwerin; J. Treuner/S. Bielack, Pädiatrische Hämatologie/Onkologie, Olgahospital, Stuttgart; W. Rauh, Mutterhaus der Borromäerinnen, Trier; D. Niethammer/R. Handgretinger, Universitätsklinik für Kinderheilkunde und Jugendmedizin, Tübingen; K.-M. Debatin, Klinik für Kinder- und Jugendmedizin, Universitätsklinikum, Ulm; P.-G. Schlegel, Universitäts-Kinderklinik, Würzburg

**Germany (CoALL):** J. Otte, Klinik für Kinder- und Jugendmedizin, Krankenhaus Bielefeld GmbH, Bielefeld-Bethel; J. Spaar, Prof.-Hess-Kinderklinik, Klinikum Bremen-Mitte gGmbH, Bremen; U. Göbel, Klinik für Pädiatrische Hämatologie und Onkologie, Universitätsklinikum, Düsseldorf; J. F. Beck, Pädiatrische Onkologie und Hämatologie, Universitätsmedizin,

Greifswald; D. Körholz, Klinik für Kinder und Jugendliche, Kinderonkologie, Universitätsklinikum, Leipzig; R. Schneppenheim, Pädiatrische Hämatologie und Onkologie, Universitätsklinikum Hamburg Eppendorf, Hamburg; A. Borkhardt, Abt. Hämatologie/Onkologie, Dr. von Haunersches Kinderspital, München; J. Wolff, Pädiatrische Hämatologie, Onkologie und SZT, Universitätsklinikum, Regensburg; M. Albani, Kinderklinik, Dr.-Horst-Schmidt-Kliniken, Wiesbaden; S. Wirth, Zentrum für Kinder- und Jugendmedizin, Helios Klinikum Wuppertal, Wuppertal

**Switzerland (BFM):** P. Imbach/Dr. R. Angst, Klinik für Kinder und Jugendliche, Aarau; U. Caflisch, Pädiatrische Hämatologie-Onkologie, Kinderspital, Luzern; J. Greiner,

Ostschweizerisches Kinderspital, St. Gallen; F. Niggli, Universitäts-Kinderklinik, Zürich

**Denmark (NOPHO):** S. Rosthøj, Department of Pediatrics, Aalborg Hospital, Aalborg; B. Klug Albertsen, Department of Pediatric Oncology, Skejby Hospital, Aarhus; L. Hjalgrim, Pediatric Clinic II, Rigshospitalet, Copenhagen; P. S. Wehner, Department of Pediatrics, Odense University Hospital, Odense

**Finland (NOPHO):** P. Lähteenmäki, University Hospital TYKS, Department of Pediatrics, Åbo/Turku; P. Huttunen, University Hospital for Children and Adolescents, Helsinki; M. Arola, Tampere University Hospital, Department of Pediatrics, Tampere; P. Riikonen, Kuopio University Hospital, Kuopio; M. Möttönen, University Central Hospital, Department of Paediatrics and Adolescents, Oulu

**Norway (NOPHO):** M.W. Gunnes, Department of Pediatric Oncology, Haukeland University Hospital, Bergen; J. Büchner, Department of Pediatric Oncology, Rikshospitalet, Oslo; N. Stabell, Department of Pediatrics, Tromsø Hospital, Tromsø; H. Thomassen, Department of Pediatrics, St. Olav University Hospital, Trondheim

**Sweden (NOPHO):** K. Mellgren, The Queen Silvia Children's Hospital, Göteborg; H. Björgvinsdottir/M. Behrendtz, Department of Pediatric Oncology, University Hospital, Linköping; S. Ranta, Department of Pediatric Oncology, Karolinska University Hospital,

Stockholm; U.N. Nyström, Department of Pediatrics, University of Umeå; A. Englund, Department of Pediatric Hematology and Oncology, Uppsala University Children's Hospital, Uppsala

**France (SFCE):** I. Pellier, CHU, Angers; E. Plouvier, CHU, Besançon; Y. Perel, CHU, Bordeaux; G. Couillaut, CHU, Dijon; F. Mazingue/B. Nelken, CHU, Lille; Y. Bertrand/C. Bergeron, IHOP, HCL and CLB, Lyon; G. Michel/C. Coze, CHU, Marseille; N. Sirvent, CHU, Montpellier; C. Schmitt, CHU, Nancy; C. Thomas, CHU, Nantes; A. Baruchel, Robert Debré, Paris; G. Leverger, Trousseau, Paris; H. Pacquement, Curie, Paris; F. Millot, CHU, Poitiers; V. Gandemer, CHU, Rennes; J.P. Vannier, CHU, Rouen; J.L. Stephan, CHU, St. Etienne; O. Lejars, CHU, Tours; C. Patte, IGR, Villejuif

**Italy (AIEOP):** N. Santoro, Division of Pediatric Hematology-Oncology, Bari; R. Mura, Pediatric Hematology-Oncology, Ospedale Pediatrico Microcitemico, Cagliari; A. Garaventa, Department of Pediatrics, Istituto Giannina Gaslini, Genova; F. Spreafico, Pediatric Oncology Unit, Fondazione IRCCS Istituto Nazionale dei Tumori, Milano; S. Buffardi, Pediatric Oncology Department, Santobono-Pausilipon Hospital of Napoli, Napoli; F. Casale, Pediatric Oncology Service, Pediatric Department, Second University of Napoli, Napoli; A. Rosolen/M. Pillon/G. Basso, Clinic of Pediatric Hematology-Oncology, Department of Women's and Children's Health, University of Padova, Padova; P. Maurizi, Department of Pediatric Oncology, A. Gemelli Hospital, UCSC, Catholic University of Roma, Roma; A. Lombardi, Department of Pediatric Hematology-Oncology, Bambino Gesù Hospital, Roma; M. Piglione, Division of Pediatric Hematology-Oncology, Regina Margherita Children's Hospital, Torino; G.A. Zanazzo, Pediatric Hematology-Oncology, Institute for Maternal and Child Health IRCCS Burlo Garofolo, Trieste

**Poland (PPLSG):** K. Muszyńska-Roslan, Department of Pediatric Oncology and Hematology, Medical University of Bialystok; A. Kołtan, Department of Pediatric Hematology and Oncology, Nicolaus Copernicus University, Bydgoszcz; M. Wiczorek,

Center of Pediatrics and Oncology, Chorzów; L. Maciejka-Kembłowska, Department of Pediatrics, Hematology, Oncology and Endocrinology, Medical University, Gdansk; T. Kutrzeba-Luszawska/E. Wyrobek, Department of Pediatric Oncology/Hematology, Medical College Jagiellonian University, Krakow; M. Stolarska, Department of Pediatrics, Oncology, Hematology and Diabetology, Institute of Pediatrics, Medical University, Lodz; J. Stefaniak, Department of Pediatric Hematology, Oncology and Transplantology, Medical University, Lublin; K. Stefańska/B. Konatkowska, Department of Pediatric Oncology, Hematology and Transplantology, University of Medical Sciences, Poznań; B. Sopyło, Department of Pediatrics, Hematology and Oncology, Medical University of Warsaw, Warsaw; G. Wróbel/D. Kulej, Department of Bone Marrow Transplantation, Children Oncology and Hematology, Wroclaw Medical University, Wroclaw; H. Bubala, Department of Pediatric Hematology and Oncology, Medical University of Silesia in Katowice, Zabrze

***The Netherlands (DCOG):*** J. Zsiros, University Medical Centre, Emma Children's Hospital, Amsterdam; G.J.A. Kaspers, Free University Medical Centre, Amsterdam; E.S.J.M. de Bont, University Medical Centre, Groningen; L.M. Ball, Leids University Medical Centre, Leiden; J.L.C.M. Loeffen, Radboud University Medical Centre, Nijmegen; M.B. Bierings, University Medical Centre, Utrecht

***UKCCSG:*** A. McCarthy, Royal Hospital for Sick Children, Belfast; S. Lowis, Bristol Royal Hospital for Sick Children, Bristol; D. Williams, Addenbrooke's Hospital, Cambridge; H. Traunecker, Children's Hospital for Wales, Cardiff; H. Wallace, Royal Hospital for Sick Children, Edinburgh; E. Chalmers, Royal Hospital for Sick Children, Glasgow; S. Kinsey, General Infirmary, Leeds; S. Kinsey, St James's Hospital, Leeds; M. Taj, Royal Marsden Hospital, London; R. Wynn, Royal Children's Hospital, Manchester; K. Windebank, Royal Victoria Infirmary, Newcastle; A. Jenkins, Children's Hospital, Sheffield; J. Kohler, General Hospital, Southampton; M. Taj, Royal Marsden Hospital (Surrey), Sutton

**List of data managers involved in the trial**

**Austria (BFM):** N. Mühlegger, St. Anna Kinderspital, Vienna

**France (SFCE):** B. Ravis, Service de Pharmacologie Clinique HCL, Lyon

**Germany (BFM/CoALL):** U. Meyer, Department of Pediatric Hematology/Oncology, Giessen

**Italy (AIEOP):** E. Carraro, Clinic of Pediatric Hematology-Oncology, Department of Women's and Children's Health, University of Padova, Padova

**Poland (PPLSG):** M. Rapala, Department of Bone Marrow Transplantation, Children Oncology and Hematology, Wroclaw Medical University, Wroclaw

**Sweden (NOPHO):** K. Mellgren, The Queen Silvia Children's Hospital, Göteborg

**The Netherlands (DCOG):** C. Damen-Korbijn, Trial and Data Centre DCOG, The Hague

**UK (UKCCSG):** D. Hussein, Cancer Research UK Clinical Trials Unit, University of Birmingham; R. Hobson, Hearts of Oak House, Leicester

**Pathologists and biologists involved in the trial (reference pathology, immunophenotyping, cytology, and genetics)**

**Austria (BFM):** A. Chott/I. Simonitsch-Klupp/L. Müllauer, Institut für Klinische Pathologie, Medizinische Universität Wien, Wien; Prof. Dr. H. Gadner/Prof. Dr. W. Holter/O. Haas/E. Krömer-Holzinger/G. Mann/A. Attarbaschi/M. Dworzak, St. Anna Kinderspital, Wien; W. Knapp/W. Pickl, Institut für Immunologie, Medizinische Universität Wien, Wien

**Czechia (BFM):** R. Kodet/E. Vodickova/E. Mejstrikova/E. Stejskalova, University Hospital Motol, Prague

**Germany (BFM/CoALL):** W.-D. Ludwig/R. Ratei, Klinik für Hämatologie, Onkologie und Tumormmunologie, Robert-Rössle-Klinik, Helios-Klinikum Berlin-Buch, Berlin; H. Stein, Institut für Pathologie, Universitätsklinikum Benjamin Franklin, Berlin; L. Hansmann, Senckenbergisches Institut für Pathologie, Johann Wolfgang Goethe-Universität, Frankfurt; A. Reiter/J. Harbott, Pädiatrische Hämatologie und Onkologie, Justus-Liebig-Universität,

Gießen; G. Janka/H. Kabisch, Pädiatrische Hämatologie und Onkologie, Universitätsklinikum Hamburg-Eppendorf, Hamburg; R. Parwaresch/W. Klapper, Sektion Hämatopathologie und Lymphknotenregister, Institut für Pathologie, Universitätsklinikum Schleswig-Holstein, Campus Kiel, Kiel; R. Siebert, Institut für Humangenetik, Universitätsklinikum Schleswig-Holstein, Campus Kiel, Kiel; A. C. Feller, Institut für Pathologie, Universitätsklinikum Schleswig-Holstein, Campus Lübeck, Lübeck; P. Möller, Institut für Pathologie, Universitätsklinikum Ulm, Ulm; H. Müller-Hermelink/A. Rosenwald, Institut für Pathologie, Julius-Maximilians-Universität, Würzburg

***Switzerland (BFM):***

J.-P. Bourquin/F. Niggli/M. Schmutz/J. Tchinda, Universitäts-Kinderspital, Zürich;  
M Tinguely/Dr. E. Haralambieva, Institut für Klinische Pathologie, Universitätsspital Zürich,  
Zürich

***France (SFCE):*** C. Chassagne, CLB, Lyon; F. Dijoud/A. Plesa/M.P. Pagès, HCL, Lyon; E. Macintyre, Hôpital Necker, Paris

***Italy (AIEOP):*** G. Basso, Clinic of Pediatric Hematology-Oncology, Department of Women's and Children's Health, University of Padova, Padova; Lara Mussolin, Istituto di Ricerca Pediatrica, Fondazione Città della Speranza, Padova; E.S.G. d'Amore, Department of Pathology, San Bartolo Hospital, Vicenza

***Poland (PPLSG):*** J. Małyk, Department of Pediatric Pathology, Medical University of Warsaw, Warsaw

***Sweden (NOPHO):*** A. Porwit, Stockholm; U. Hansson, Göteborg

***The Netherlands (DCOG):*** Ph.M. Kluin, Department of Pathology and Medical Biology, University Medical Center Groningen, Groningen

***UK (UKCCSG):*** K. McCarthy, Department of Histopathology, Cheltenham General Hospital, Cheltenham; J. Swansbury, The Royal Marsden Hospital, London



### **Supplement 2: Further exclusion criteria**

Further exclusion criteria were: participation in another clinical trial, pregnancy, lactation, human immunodeficiency virus infection or acquired immunodeficiency syndrome, severe immunodeficiency, previous organ transplantation, previous malignancy, pre-existing disease prohibiting chemotherapy as outlined in the protocol, previous chemotherapy or radiotherapy, and previous systemic corticosteroid treatment for more than 8 days within two months before the start of therapy according to the protocol in the EURO-LB02 trial.

### **Supplement 3: Minimal diagnostic requirements for tumor biopsies**

Obligatory antibodies for all entities were TdT, CD3, CD79a, MPO and Ki67. CD34 was required in cases of TdT-negative results, and CD20 was required in cases negative for CD3 and CD79a.

The following panel was required for pB-LBL (ICD-O 9728/3): CD10 and  $\mu$ -,  $\kappa$ -, and  $\lambda$ -expression.

The following antibody panel was required for T-LBL (ICD-O 9729/3): CD1a, CD4, CD8, and CD56. Optional antibodies for T-LBL (ICD-O 9729/3) were CD2, CD5, CD7, and  $\beta$ F1. Optional antibodies for CD56-positive T-LBL (ICD-O 9729/3) were perforin and granzyme B.

### **Supplement 4: Staging**

Staging included chest computed tomography (CT) scans and abdominal ultrasound and/or magnetic resonance imaging (MRI) or CT. CNS disease was diagnosed in cases with  $\geq 5$  cells/ $\mu$ L in the CSF and morphologically identifiable blasts in cytospin preparations of CSF or in cases exhibiting cerebral/medullary infiltrates on cranial/spinal MRI and/or cranial nerve

palsy not caused by extradural lymphoma. BM involvement was diagnosed as  $\geq 5\%$  and  $< 25\%$  lymphoblasts in the BM aspiration smear. The St. Jude staging system was applied.<sup>1</sup>

In patients with a life-threatening mediastinal mass, the initiation of cytoreductive therapy and the withholding of invasive diagnostic procedures were recommended until the patients were stabilized. In patients undergoing delayed CSF or BM aspiration, the BM/CNS status was designated as unknown.

### **Supplement 5: Recommendations for infection prophylaxis and therapy**

Prophylactic treatment of *Pneumocystis carinii* with trimethoprim-sulfamethoxazole was recommended for the entire therapy duration, including maintenance therapy. The administration of prophylactic treatments against further infections and for infection therapy was performed at the discretion of the participating groups.

### **Supplement 6: Detailed randomization procedures**

Patients with T-LBL were first randomized using a factorial design to receive either prednisone (60 mg/m<sup>2</sup>/d) or dexamethasone (10 mg/m<sup>2</sup>/d) on days 8-28 during induction phase Ia, with dexamethasone representing the experimental arm (randomization 1), and second, to receive maintenance therapy until a total treatment duration of 24 months or 18 months was achieved, with 18 months designated as the experimental arm (randomization 2). The groups included in both random assignments were balanced and stratified according to disease stage, study group, and, for the 2nd randomization, the use of corticosteroids in phase Ia. Randomizations 1 and 2 were performed within the first 7 days of the prednisone pre-phase and within 21 days after the beginning of maintenance therapy, respectively.

### **Supplement 7: Response criteria**

Tumor responses were evaluated on day 33 of induction therapy. In cases with BM/CSF involvement at diagnosis, BM/CSF were re-evaluated on day 33. A non-response was defined

as less than 35% regression in tumor volume, persistence of >5% blasts in BM and/or the persistence of blasts in CSF on day 33. Non-responding patients were designated as treatment failures and were removed from the study. A relapse was defined as biopsy-proven re-growth or as disease recurrence in patients who had achieved a response on day 33 of induction therapy.

### **Supplement 8: Power and sample size calculations**

For the first randomization, assuming a 3-year EFS of 80% with the reference treatment, 270 patients per arm were required to show an absolute difference of 10% in 3-year EFS from randomization, based on a 5% probability of type I error and 90% power using a bilateral formulation log-rank test (intent-to-treat analysis). For the second randomization, the probability of 3-year EFS after having survived event-free for 15 months after diagnosis was estimated to be 95%. Considering a non-inferiority range of 4% and a 5% probability of type I error, 450 patients were required in each arm to show equivalence at 80% power (primary analysis as treated). The recruitment for the second randomization was planned to be continued in a subsequent study.

### **Supplement 9: Monitoring of TDs**

The absolute death rate observed in each treatment arm (and the whole study population) was planned to be compared to a reference rate to detect an absolute increase in the number of TDs according to a Wald sequential plan.

In the NHL-BFM 90 and 95 studies, 4 TDs were observed among 387 patients in therapy group I (Non-B-NHL), i.e., 1% (95% CI: 0.29-2.6%).

Based on this previous experience, we chose the following parameters:  $p_0=1\%$  and  $p_1=4\%$ , with  $\alpha=5\%$  and  $\beta=1\%$ .

Using the Wald's test with these parameters, the boundaries were:

| Number of patients with at least 30 weeks of follow up or TD | Number of TDs |
|--------------------------------------------------------------|---------------|
| 3-41                                                         | 3             |
| 42-87                                                        | 4             |
| 88-133                                                       | 5             |
| 134-179                                                      | 6             |
| 180-225                                                      | 7             |
| 226-271                                                      | 8             |
| 272-300                                                      | 9             |

### **Amended stopping rule after the 5<sup>th</sup> case of TD**

Based on a compilation of TRM from previous trials by the CoALL, SFCE, PPLLSG and NOPHO study groups, 13 of 430 patients suffered from TRM in these trials (TRM rate 3%, 95% CI: 1.6-5.1%). We chose the following parameters based on this previous experience:  $p_0=2\%$  and  $p_1=4\%$ , with  $\alpha=5\%$  and  $\beta=1\%$ .

Based on these assumptions, the risk of wrongly concluding that a substantial number of TDs occurred was equal to an  $\alpha$  value of 5% (whereas the actual rate is equal to  $p_0 \leq 2\%$ ).

Additionally, the power to detect an excess number of TDs was equal to a  $1-\beta$  value of 99% (if the real rate was equal to  $p_1=4\%$ ).

Using Wald's test with these parameters, the boundaries were:

| Number of patients with at least 30 weeks of follow-up*<br>or TD | Number of TDs |
|------------------------------------------------------------------|---------------|
| 6-28                                                             | 5             |
| 29-62                                                            | 6             |
| 63-97                                                            | 7             |
| 98-132                                                           | 8             |
| 133-166                                                          | 9             |
| 167-201                                                          | 10            |
| 202-235                                                          | 11            |
| 236-270                                                          | 12            |
| 271-305                                                          | 13            |
| 306-339                                                          | 14            |
| 340-374                                                          | 15            |

\*Thirty weeks approximates the period from the beginning of induction therapy until the beginning of maintenance therapy.

#### Supplement 10: Non-fatal severe adverse events (SAEs)

| Reg. No. | Diagnosis | 1 <sup>st</sup> Randomization | Steroid administered | Phase in which the SAE occurred | SAE |
|----------|-----------|-------------------------------|----------------------|---------------------------------|-----|
|----------|-----------|-------------------------------|----------------------|---------------------------------|-----|

| Reg. No. | Diagnosis | 1 <sup>st</sup> Randomization | Steroid administered | Phase in which the SAE occurred | SAE                                                    |
|----------|-----------|-------------------------------|----------------------|---------------------------------|--------------------------------------------------------|
| 0016     | T-LBL     | Yes                           | Dex                  | Prot. M                         | Delayed elimination of MTX and impaired renal function |
| 1027     | T-LBL     | Yes                           | Dex                  | Ia                              | Hepatopathy                                            |
| 1062     | T-LBL     | No                            | PRED                 | IIa                             | Psychosis after discontinuation of corticosteroids     |
| 1062     | T-LBL     | No                            | PRED                 | IIa                             | Sepsis ( <i>Hafnia alvei</i> ), ARDS                   |
| 1064     | pB-LBL    | No                            | PRED                 | IIb                             | Bulbar syndrome, suspected MTX toxicity                |
| 1051     | T-LBL     | Yes                           | Dex                  | Ia                              | Sinus vein thrombosis                                  |
| 1105     | T-LBL     | Yes                           | Dex                  | Ia                              | Hypoproteinemia and hypokalemia                        |
| 1109     | T-LBL     | Yes                           | Dex                  | Ia                              | Hepatotoxicity                                         |
| 1135     | T-LBL     | Yes                           | Dex                  | Ia                              | Addison crisis                                         |
| 1165     | T-LBL     | Yes                           | Dex                  | Prot. M                         | Fracture of the radius (traumatic)                     |
| 1165     | T-LBL     | Yes                           | Dex                  | IIa                             | Enteritis                                              |
| 1165     | T-LBL     | Yes                           | Dex                  | IIb                             | Suspected appendicitis and appendectomy                |
| 2004     | T-LBL     | Yes                           | Dex                  | Ia                              | Hemorrhagic varicella infection                        |
| 4004     | T-LBL     | Yes                           | Dex                  | Ib                              | Septicemia ( <i>S. aureus</i> )                        |
| 4015     | T-LBL     | No data                       | Dex                  | Ia                              | <i>Pneumocystis carinii</i> infection                  |
| 5021     | T-LBL     | Yes                           | Dex                  | Ia                              | Convulsions, coma, fever, and paresis                  |
| 6048     | T-LBL     | Yes                           | Dex                  | Ia                              | Thrombosis of the femoral vein                         |
| 6048     | T-LBL     | Yes                           | Dex                  | IIa                             | Allergic reaction to asparaginase                      |
| 6053     | T-LBL     | Yes                           | Dex                  | Ia                              | Dysphagia and laryngeal palsy                          |

| Reg. No. | Diagnosis | 1 <sup>st</sup> Randomization | Steroid administered | Phase in which the SAE occurred | SAE                                                                                     |
|----------|-----------|-------------------------------|----------------------|---------------------------------|-----------------------------------------------------------------------------------------|
| 6067     | T-LBL     | Yes                           | Dex                  | Ia                              | Hypovolemic shock and grade 4 diarrhea                                                  |
| 6067     | T-LBL     | Yes                           | Dex                  | Ia                              | Cerebral thrombophlebitis                                                               |
| 6074     | T-LBL     | Yes                           | Dex                  | maintenance                     | Vomiting and paresthesia                                                                |
| 6074     | T-LBL     | Yes                           | Dex                  | maintenance                     | Osteonecrosis                                                                           |
| 6075     | T-LBL     | Yes                           | Dex                  | Ia                              | Enterocolitis                                                                           |
| 6075     | T-LBL     | Yes                           | Dex                  | Ia                              | Pulmonary bilateral invasive aspergillosis                                              |
| 8001     | T-LBL     | Yes                           | Dex                  | Ia                              | Severe colitis                                                                          |
| 8003     | T-LBL     | No                            | Dex                  | Ia                              | Thrombosis of the right femoral vein                                                    |
| 1009     | T-LBL     | Yes                           | Pred                 | Ia                              | Necrotizing pancreatitis                                                                |
| 1009     | T-LBL     | Yes                           | Pred                 | Ia                              | Cerebral seizures resulting from hypertensive encephalopathy due to renal insufficiency |
| 1012     | T-LBL     | Yes                           | Pred                 | Ia                              | Hepatotoxicity and pancreatitis                                                         |
| 1033     | T-LBL     | Yes                           | Pred                 | Prot. M                         | Hemiparesis                                                                             |
| 1065     | pB-LBL    | No                            | Pred                 | Prot. M                         | Neurological abnormalities after MTX treatment                                          |
| 1078     | pB-LBL    | No                            | Pred                 | Prot. M                         | Impaired MTX excretion                                                                  |
| 1084     | pB-LBL    | No                            | Pred                 | Prot. M                         | Impaired MTX excretion                                                                  |
| 1090     | T-LBL     | Yes                           | Pred                 | Ia                              | Sinus vein thrombosis                                                                   |
| 1119     | T-LBL     | No                            | Pred                 | Prot. M                         | Anaphylactic shock after MTX treatment                                                  |
| 1127     | pB-LBL    | No                            | Pred                 | Ia                              | Severe pancreatitis                                                                     |

| Reg. No. | Diagnosis | 1 <sup>st</sup> Randomization | Steroid administered | Phase in which the SAE occurred | SAE                                                                           |
|----------|-----------|-------------------------------|----------------------|---------------------------------|-------------------------------------------------------------------------------|
| 1128     | Bi-LBL    | Yes                           | Pred                 | Prot. M                         | Severe neurological abnormalities after high dose MTX treatment               |
| 1128     | Bi-LBL    | Yes                           | Pred                 | Ia                              | Attempted suicide (grade 4 depression)                                        |
| 1129     | T-LBL     | Yes                           | Pred                 | Ia                              | Toxic encephalopathy with loss of consciousness and respiratory insufficiency |
| 1136     | T-LBL     | Yes                           | Pred                 | Ia                              | Need for ventilation and seizures with unconsciousness                        |
| 1142     | T-LBL     | Yes                           | Pred                 | Ia                              | Pulmonary aspergillosis                                                       |
| 1144     | pB-LBL    | No                            | Pred                 | Ia                              | Increased intraocular pressure                                                |
| 1150     | pB-LBL    | No                            | Pred                 | Prot. M                         | CNS bleeding in the right temporal lobe                                       |
| 1169     | pB-LBL    | No                            | Pred                 | Ia                              | Colon perforation                                                             |
| 1174     | pB-LBL    | No                            | Pred                 | Ia                              | Severe hypoproteinemia, sepsis and infection with <i>C. difficile</i>         |
| 1182     | pB-LBL    | No                            | Pred                 | Ia                              | Intradural bleeding after therapeutic lumbar puncture                         |
| 1807     | T-LBL     | No                            | Pred                 | Ia                              | Sepsis induced by <i>Pseudomonas aeruginosa</i>                               |
| 2007     | pB-LBL    | No                            | Pred                 | Ia                              | Duodenal perforation                                                          |



| Reg. No. | Diagnosis | 1 <sup>st</sup> Randomization | Steroid administered | Phase in which the SAE occurred | SAE                                                                                                             |
|----------|-----------|-------------------------------|----------------------|---------------------------------|-----------------------------------------------------------------------------------------------------------------|
| 2016     | T-NHL nfc | Yes                           | Pred                 | IIa                             | <i>E. coli</i> -induced sepsis, dexamethasone-induced diabetes mellitus, Herpes zoster infection (skin and eye) |
| 2017     | T-LBL     | No                            | Pred                 | Ia                              | Seizures and PRES                                                                                               |
| 2018     | T-LBL     | No                            | Pred                 | Ia                              | Varicella zoster infection and disseminated candida infection                                                   |
| 2021     | pB-LBL    | No                            | Pred                 | Ib                              | Arterial hypotension requiring catecholamine therapy                                                            |
| 2021     | pB-LBL    | No                            | Pred                 | IIa                             | Diabetes mellitus                                                                                               |
| 2021     | pB-LBL    | No                            | Pred                 | IIb                             | Seizures                                                                                                        |
| 5032     | T-LBL     | Yes                           | Pred                 | IIa                             | Polyneuropathy                                                                                                  |
| 6028     | T-LBL     | No                            | Pred                 | Ia                              | Pneumopathy (CMV)                                                                                               |
| 6028     | T-LBL     | No                            | Pred                 | IIa                             | Generalized seizures                                                                                            |
| 6057     | T-LBL     | No                            | Pred                 | IIb                             | Diffuse interstitial pneumonia                                                                                  |
| 6057     | T-LBL     | No                            | PRED                 | I/a                             | Left leg phlebitis                                                                                              |
| 6059     | pB-LBL    | No                            | Pred                 | IIa                             | Septic shock                                                                                                    |
| 6062     | Bi-LBL    | No                            | Pred                 | Ib                              | Hemorrhagic cystitis (BK virus)                                                                                 |
| 6062     | Bi-LBL    | No                            | Pred                 | IIa                             | Alveolitis grade 3                                                                                              |
| 6065     | T-LBL     | Yes                           | Pred                 | maintenance                     | Osteonecrosis                                                                                                   |
| 6080     | pB-LBL    | No                            | Pred                 | Prot. M                         | Partial convulsions                                                                                             |

**Supplement 11: Grade III and IV toxic AEs observed during the pre-phase and in induction phase Ia.**

| Phase<br>Toxicity grade             | Pre-phase |     | Ia - Prednisone |     |      | Ia -<br>Dexamethasone |     |      | p†   |                  |
|-------------------------------------|-----------|-----|-----------------|-----|------|-----------------------|-----|------|------|------------------|
|                                     | III       | IV  | III             | IV  | III  | IV                    | III | IV   |      |                  |
|                                     | N         | %   | %               | N   | %    | %                     | N   | %    |      | %                |
| <b>Hemoglobin</b>                   | 305       | 2.6 | .               | 208 | 13.9 | 1.9                   | 102 | 26.5 | 7.8  | <b>&lt;0.001</b> |
| <b>Leukocytes (total WBC)</b>       | 306       | 1.6 | 0.3             | 210 | 16.2 | 8.6                   | 101 | 19.8 | 27.7 | <b>&lt;0.001</b> |
| <b>Granulocytes</b>                 | 279       | 1.8 | 1.1             | 190 | 17.9 | 13.2                  | 93  | 15.1 | 34.4 | <b>0.004</b>     |
| <b>Platelets</b>                    | 307       | 0.3 | 0.3             | 209 | 3.8  | 1.0                   | 103 | 19.4 | 7.8  | <b>&lt;0.001</b> |
| <b>PTT*</b>                         | 115       | 0.9 | .               | 87  | 11.5 | .                     | 45  | 24.4 | .    | 0.77             |
| <b>Fibrinogen*</b>                  | 112       | 1.8 | .               | 87  | 32.2 | 12.6                  | 41  | 34.1 | 9.8  | 1.00             |
| <b>Antithrombin*</b>                | 106       | .   | .               | 83  | 22.9 | 2.4                   | 41  | 31.7 | 4.9  | 0.212            |
| <b>Infection</b>                    | 309       | 1.9 | 0.3             | 210 | 6.2  | 0.5                   | 103 | 12.6 | 3.9  | 0.009            |
| <b>Fever</b>                        | 306       | .   | 0.3             | 208 | 1.0  | .                     | 101 | 2.0  | 2.0  | 0.092            |
| <b>Stomatitis</b>                   | 305       | .   | .               | 208 | .    | 1.9                   | 101 | 5.9  | 2.0  | 0.023            |
| <b>Diarrhea</b>                     | 307       | .   | .               | 209 | 1.4  | 1.4                   | 104 | 1.9  | 5.8  | 0.078            |
| <b>Creatinine</b>                   | 306       | 0.3 | .               | 206 | 0.5  | .                     | 101 | .    | 1.0  | 0.55             |
| <b>Bilirubin</b>                    | 275       | 0.7 | 0.4             | 200 | 7.0  | 0.5                   | 98  | 10.2 | 1.0  | 0.283            |
| <b>S-GOT/S-GPT</b>                  | 296       | 4.7 | 0.7             | 205 | 14.1 | 3.4                   | 102 | 20.6 | 2.9  | 0.244            |
| <b>Cardiac function</b>             | 275       | 1.1 | 0.7             | 163 | .    | 0.6                   | 89  | 2.2  | 1.1  | 0.128            |
| <b>Arrhythmia</b>                   | 296       | 0.7 | 0.3             | 189 | .    | .                     | 97  | 3.1  | 1.0  | 0.013            |
| <b>Thrombosis/<br/>embolism</b>     | 305       | 3.3 | .               | 207 | 7.7  | .                     | 99  | 16.2 | .    | 0.029            |
| <b>Central<br/>neurotoxicity</b>    | 308       | 0.3 | .               | 209 | 0.5  | 4.3                   | 103 | 2.9  | 3.9  | 0.441            |
| <b>Peripheral<br/>neurotoxicity</b> | 308       | 0.6 | .               | 206 | 1.9  | .                     | 102 | 10.8 | 2.0  | <b>&lt;0.001</b> |
| <b>Anaphylaxis</b>                  | 304       | .   | .               | 206 | .    | 0.5                   | 102 | 1.0  | .    | 0.553            |
| <b>Osteonecrosis</b>                | 288       | .   | .               | 193 | .    | .                     | 95  | 1.1  | .    | 0.330            |
| <b>Other scale</b>                  | 231       | 0.9 | 0.4             | 143 | 5.6  | 2.8                   | 73  | 8.2  | 4.1  | 0.467            |

PTT, Partial thromboplastin time; N, number of patients with a valid report as to the individual criteria per treatment phase. \*The number of patients in whom toxicity due to coagulation was documented is low since the documentation of coagulation began in March 2005.

†p-value for Fisher's exact test of the difference in the frequency (grade III and IV combined) of patients receiving prednisone versus dexamethasone in induction phase Ia.

**Supplement 12: Grade III and IV toxic AEs observed during protocols Ib, M, IIa and IIb.**

| Phase<br>Toxicity grade             | Ib  |      |      | M   |      |      | IIa |      |      | IIb |      |      |
|-------------------------------------|-----|------|------|-----|------|------|-----|------|------|-----|------|------|
|                                     |     | III  | IV   |
|                                     | N   | %    | %    | N   | %    | %    | N   | %    | %    | N   | %    | %    |
| <b>Hemoglobin</b>                   | 303 | 48.5 | 37.6 | 291 | 16.2 | 3.8  | 251 | 23.5 | 3.2  | 244 | 48.0 | 13.9 |
| <b>Leukocytes (total WBC)</b>       | 304 | 23.0 | 70.4 | 291 | 43.6 | 12.4 | 252 | 33.3 | 49.6 | 245 | 37.6 | 47.3 |
| <b>Granulocytes</b>                 | 282 | 14.5 | 79.8 | 266 | 32.7 | 27.4 | 231 | 17.7 | 67.5 | 225 | 28.0 | 60.4 |
| <b>Platelets</b>                    | 305 | 52.5 | 12.5 | 288 | 17.0 | 1.7  | 251 | 31.9 | 4.4  | 245 | 44.5 | 4.5  |
| <b>PTT*</b>                         | 109 | 7.3  | .    | 95  | 7.4  | .    | 102 | 12.7 | .    | 68  | 11.8 | .    |
| <b>Fibrinogen*</b>                  | 102 | 2.9  | 5.9  | 90  | 1.1  | .    | 99  | 23.2 | 2.0  | 63  | 4.8  | 1.6  |
| <b>Antithrombin*</b>                | 100 | 3.0  | 1.0  | 90  | .    | .    | 98  | 3.1  | 1.0  | 62  | 1.6  | .    |
| <b>Infection</b>                    | 301 | 12.0 | 1.7  | 290 | 6.6  | 0.3  | 251 | 9.6  | 2.0  | 246 | 4.1  | 0.4  |
| <b>Fever</b>                        | 303 | 5.0  | 0.7  | 288 | 1.0  | .    | 249 | 1.6  | .    | 244 | 0.8  | 0.4  |
| <b>Stomatitis</b>                   | 302 | 3.0  | 0.3  | 292 | 5.8  | 2.4  | 252 | 7.9  | 4.8  | 246 | .    | .    |
| <b>Diarrhea</b>                     | 303 | 1.0  | 0.3  | 290 | 1.0  | 1.0  | 250 | 2.0  | 0.4  | 247 | 1.2  | .    |
| <b>Creatinine</b>                   | 298 | .    | .    | 289 | 0.3  | .    | 249 | .    | .    | 234 | .    | .    |
| <b>Bilirubin</b>                    | 286 | 5.6  | 0.3  | 272 | 2.2  | .    | 237 | 1.3  | .    | 221 | .    | .    |
| <b>S-GOT/S-GPT</b>                  | 293 | 22.2 | 2.4  | 285 | 10.5 | 1.4  | 246 | 11.0 | 2.4  | 231 | 12.6 | 0.4  |
| <b>Cardiac function</b>             | 205 | 0.5  | .    | 219 | .    | .    | 211 | .    | .    | 171 | .    | .    |
| <b>Arrhythmia</b>                   | 272 | 0.4  | .    | 265 | .    | .    | 238 | .    | .    | 213 | .    | .    |
| <b>Thrombosis/<br/>embolism</b>     | 295 | 7.8  | .    | 289 | 4.2  | .    | 245 | 4.9  | 0.4  | 236 | 3.0  | .    |
| <b>Central<br/>neurotoxicity</b>    | 302 | 0.3  | 0.3  | 291 | .    | 0.7  | 250 | 0.8  | 0.8  | 245 | .    | 0.8  |
| <b>Peripheral<br/>neurotoxicity</b> | 300 | 1.0  | .    | 292 | 0.3  | .    | 249 | 2.0  | .    | 244 | .    | 0.4  |
| <b>Anaphylaxis</b>                  | 300 | 0.7  | 0.3  | 289 | 0.7  | 0.3  | 245 | 0.8  | 0.4  | 243 | .    | .    |
| <b>Osteonecrosis</b>                | 277 | 0.4  | .    | 267 | .    | 0.4  | 226 | 0.4  | 0.4  | 224 | .    | .    |
| <b>Other scale</b>                  | 218 | 4.1  | 0.9  | 214 | 2.3  | 0.5  | 162 | 5.6  | 1.2  | 182 | 0.5  | 0.5  |

PTT, Partial thromboplastin time; S-GOT, serum glutamic-oxaloacetic transaminase; S-GPT, serum glutamic-pyruvic transaminase.

\*The number of patients in whom toxicity due to coagulation was documented is low since the documentation of coagulation began in March 2005.



**Supplement 13: Grade III and IV toxic AEs s in induction phase Ia – randomized patients only.**

|                     |                         | AE grade (score)* |                     |       |                    |      |                   | p†   |                  |
|---------------------|-------------------------|-------------------|---------------------|-------|--------------------|------|-------------------|------|------------------|
|                     |                         | N                 | Toxicity grade 0-II |       | Toxicity grade III |      | Toxicity grade IV |      |                  |
|                     |                         |                   | N                   | %     | N                  | %    | N                 |      | %                |
| <b>Hemoglobin</b>   | <b>Ia Prednisone</b>    | 89                | 77                  | 86.5  | 10                 | 11.2 | 2                 | 2.2  | <b>0.001</b>     |
|                     | <b>Ia Dexamethasone</b> | 95                | 62                  | 65.3  | 26                 | 27.4 | 7                 | 7.4  |                  |
| <b>Leukocytes</b>   | <b>Ia Prednisone</b>    | 89                | 62                  | 69.7  | 16                 | 18.0 | 11                | 12.4 | <b>0.034</b>     |
|                     | <b>Ia Dexamethasone</b> | 94                | 51                  | 54.3  | 19                 | 20.2 | 24                | 25.5 |                  |
| <b>Granulocytes</b> | <b>Ia Prednisone</b>    | 81                | 51                  | 63.0  | 16                 | 19.8 | 14                | 17.3 | 0.210            |
|                     | <b>Ia Dexamethasone</b> | 86                | 45                  | 52.3  | 14                 | 16.3 | 27                | 31.4 |                  |
| <b>Platelets</b>    | <b>Ia Prednisone</b>    | 88                | 84                  | 95.5  | 3                  | 3.4  | 1                 | 1.1  | <b>&lt;0.001</b> |
|                     | <b>Ia Dexamethasone</b> | 95                | 69                  | 72.6  | 19                 | 20.0 | 7                 | 7.4  |                  |
| <b>PTT</b>          | <b>Ia Prednisone</b>    | 32                | 26                  | 81.3  | 6                  | 18.8 | .                 | .    | 0.580            |
|                     | <b>Ia Dexamethasone</b> | 42                | 31                  | 73.8  | 11                 | 26.2 | .                 | .    |                  |
| <b>Fibrinogen</b>   | <b>Ia Prednisone</b>    | 32                | 15                  | 46.9  | 12                 | 37.5 | 5                 | 15.6 | 0.811            |
|                     | <b>Ia Dexamethasone</b> | 38                | 20                  | 52.6  | 14                 | 36.8 | 4                 | 10.5 |                  |
| <b>Antithrombin</b> | <b>Ia Prednisone</b>    | 31                | 19                  | 61.3  | 11                 | 35.5 | 1                 | 3.2  | 1.000            |
|                     | <b>Ia Dexamethasone</b> | 38                | 24                  | 63.2  | 12                 | 31.6 | 2                 | 5.3  |                  |
| <b>Infection</b>    | <b>Ia Prednisone</b>    | 89                | 83                  | 93.3  | 6                  | 6.7  | .                 | .    | <b>0.041</b>     |
|                     | <b>Ia Dexamethasone</b> | 95                | 79                  | 83.2  | 13                 | 13.7 | 3                 | 3.2  |                  |
| <b>Fever</b>        | <b>Ia Prednisone</b>    | 87                | 87                  | 100.0 | .                  | .    | .                 | .    | 0.247            |
|                     | <b>Ia Dexamethasone</b> | 94                | 91                  | 96.8  | 2                  | 2.1  | 1                 | 1.1  |                  |
| <b>Stomatitis</b>   | <b>Ia Prednisone</b>    | 89                | 88                  | 98.9  | .                  | .    | 1                 | 1.1  | 0.119            |
|                     | <b>Ia Dexamethasone</b> | 95                | 89                  | 93.7  | 4                  | 4.2  | 2                 | 2.1  |                  |
| <b>Diarrhea</b>     | <b>Ia Prednisone</b>    | 89                | 86                  | 96.6  | 1                  | 1.1  | 2                 | 2.2  | 0.334            |
|                     | <b>Ia Dexamethasone</b> | 96                | 89                  | 92.7  | 1                  | 1.0  | 6                 | 6.3  |                  |
| <b>Creatinine</b>   | <b>Ia Prednisone</b>    | 86                | 86                  | 100.0 | .                  | .    | .                 | .    | 1.000            |
|                     | <b>Ia Dexamethasone</b> | 93                | 92                  | 98.9  | .                  | .    | 1                 | 1.1  |                  |
| <b>Bilirubin</b>    | <b>Ia Prednisone</b>    | 86                | 77                  | 89.5  | 8                  | 9.3  | 1                 | 1.2  | 1.000            |
|                     | <b>Ia Dexamethasone</b> | 90                | 81                  | 90.0  | 8                  | 8.9  | 1                 | 1.1  |                  |
| <b>S-GOT/S-GPT</b>  | <b>Ia Prednisone</b>    | 86                | 73                  | 84.9  | 11                 | 12.8 | 2                 | 2.3  | 0.437            |
|                     | <b>Ia Dexamethasone</b> | 94                | 75                  | 79.8  | 16                 | 17.0 | 3                 | 3.2  |                  |

|                                           |                         | AE grade (score)* |    |                     |    |                    |   |                   |              | p† |
|-------------------------------------------|-------------------------|-------------------|----|---------------------|----|--------------------|---|-------------------|--------------|----|
|                                           |                         | N                 |    | Toxicity grade 0-II |    | Toxicity grade III |   | Toxicity grade IV |              |    |
|                                           |                         | N                 | %  | N                   | %  | N                  | % | N                 | %            |    |
| <b>Cardiac function</b>                   | <b>Ia Prednisone</b>    | 72                | 72 | 100.0               | .  | .                  | . | .                 | 0.249        |    |
|                                           | <b>Ia Dexamethasone</b> | 83                | 80 | 96.4                | 2  | 2.4                | 1 | 1.2               |              |    |
| <b>Arrhythmia</b>                         | <b>Ia Prednisone</b>    | 82                | 82 | 100.0               | .  | .                  | . | .                 | 0.122        |    |
|                                           | <b>Ia Dexamethasone</b> | 89                | 85 | 95.5                | 3  | 3.4                | 1 | 1.1               |              |    |
| <b>Thrombosis/ embolism</b>               | <b>Ia Prednisone</b>    | 87                | 79 | 90.8                | 8  | 9.2                | . | .                 | 0.258        |    |
|                                           | <b>Ia Dexamethasone</b> | 91                | 77 | 84.6                | 14 | 15.4               | . | .                 |              |    |
| <b>Central neurotoxicity</b>              | <b>Ia Prednisone</b>    | 89                | 86 | 96.6                | .  | .                  | 3 | 3.4               | 0.333        |    |
|                                           | <b>Ia Dexamethasone</b> | 95                | 88 | 92.6                | 3  | 3.2                | 4 | 4.2               |              |    |
| <b>Peripheral neurotoxicity</b>           | <b>Ia Prednisone</b>    | 88                | 86 | 97.7                | 2  | 2.3                | . | .                 | <b>0.010</b> |    |
|                                           | <b>Ia Dexamethasone</b> | 94                | 82 | 87.2                | 10 | 10.6               | 2 | 2.1               |              |    |
| <b>Anaphylaxis</b>                        | <b>Ia Prednisone</b>    | 87                | 86 | 98.9                | .  | .                  | 1 | 1.1               | 1.000        |    |
|                                           | <b>Ia Dexamethasone</b> | 94                | 93 | 98.9                | 1  | 1.1                | . | .                 |              |    |
| <b>Osteonecrosis (avascular necrosis)</b> | <b>Ia Prednisone</b>    | 81                | 81 | 100.0               | .  | .                  | . | .                 | 1.000        |    |
|                                           | <b>Ia Dexamethasone</b> | 88                | 87 | 98.9                | 1  | 1.1                | . | .                 |              |    |
| <b>Other scale</b>                        | <b>Ia Prednisone</b>    | 59                | 55 | 93.2                | 4  | 6.8                | . | .                 | 0.545        |    |
|                                           | <b>Ia Dexamethasone</b> | 70                | 62 | 88.6                | 6  | 8.6                | 2 | 2.9               |              |    |

N, number of patients with a valid report regarding the individual criteria per treatment phase; AE, adverse event; PTT, Partial thromboplastin time; S-GOT, serum glutamic-oxaloacetic transaminase; S-GPT, serum glutamic-pyruvic transaminase.

\*according to the NCI-CTC

\*\*The number of patients in whom toxicity due to coagulation was documented is low since the documentation of coagulation began in March 2005.

†p-value for Fisher's exact test of the difference in the frequency (grade III and IV combined) of patients receiving prednisone versus dexamethasone in induction phase Ia.

Supplement 14: Figure 3

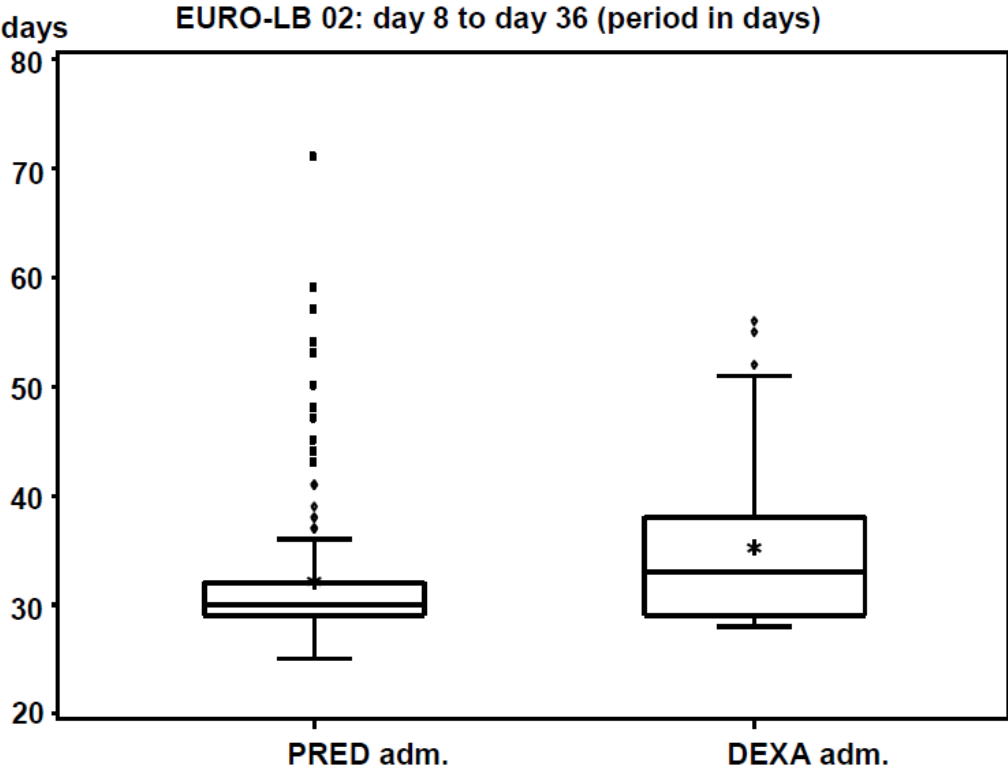



**Supplement 15. Univariate analyses of prognostic factors in patients with T-LBL only.**

|                            |          | n   | EFS (%) | SE (%) | p      | non-response/relapse (cumulative incidence) | SE (%) | p (gray) |
|----------------------------|----------|-----|---------|--------|--------|---------------------------------------------|--------|----------|
| Stage                      | I        | 0   |         |        |        |                                             |        |          |
|                            | II       | 8   | 75      | 15     |        | 25                                          | 16     |          |
|                            | III      | 150 | 81      | 3      | 0.56   | 13                                          | 3      | 0.43     |
|                            | IV       | 49  | 88      | 5      |        | 12                                          | 4      |          |
|                            | unknown  | 26  | 81      | 8      |        | 19                                          | 8      |          |
| Stage IV                   | BM+/CNS- | 37  | 86      | 6      |        | 14                                          | 6      |          |
|                            | BM-/CNS+ | 5   | 80      | 18     | 0.71   | 20                                          | 20     | 0.68     |
|                            | BM+/CNS+ | 4   | 100     | 0      |        | 0                                           | 0      |          |
| LDH                        | ≤2 UNL   | 128 | 80      | 4      | 0.35   | 15                                          | 3      | 0.35     |
|                            | >2 UNL   | 103 | 84      | 4      |        | 12                                          | 3      |          |
|                            | ≤4 UNL   | 206 | 82      | 3      | 0.80   | 14                                          | 2      | 0.79     |
|                            | >4 UNL   | 25  | 84      | 7      |        | 12                                          | 7      |          |
| Mediastinal Tumor          | no       | 17  | 76      | 10     | 0.58   | 12                                          | 8      | 0.73     |
|                            | yes      | 216 | 82      | 3      |        | 14                                          | 2      |          |
| Pleural effusion           | no       | 86  | 81      | 4      | 0.86   | 15                                          | 4      | 0.64     |
|                            | yes      | 147 | 82      | 3      |        | 13                                          | 3      |          |
| Pericardial effusion       | no       | 152 | 85      | 3      | 0.086  | 12                                          | 3      | 0.2      |
|                            | yes      | 81  | 77      | 5      |        | 17                                          | 4      |          |
| Bone involvement           | no       | 222 | 82      | 3      | 0.51   | 13                                          | 2      | 0.25     |
|                            | yes      | 11  | 73      | 13     |        | 27                                          | 14     |          |
| B-symptoms (any)           | no       | 162 | 83      | 3      | 0.54   | 12                                          | 3      | 0.26     |
|                            | yes      | 71  | 80      | 5      |        | 17                                          | 5      |          |
| Performance status*        | 1        | 57  | 88      | 4      |        | 11                                          | 4      |          |
|                            | 2        | 70  | 81      | 5      | 0.056  | 13                                          | 4      | 0.07     |
|                            | 3        | 40  | 87      | 5      |        | 13                                          | 5      |          |
|                            | 4        | 31  | 84      | 7      |        | 6                                           | 4      |          |
|                            | 5        | 34  | 65      | 8      |        | 29                                          | 8      |          |
|                            | 1 to 4   | 198 | 85      | 3      | 0.0033 | 11                                          | 2      | 0.006    |
| Initial complications, any | no       | 82  | 82      | 4      | 0.77   | 16                                          | 4      | 0.77     |
|                            | yes      | 151 | 82      | 3      |        | 13                                          | 3      |          |
| Cell lysis syndrome        | no       | 220 | 82      | 3      | 0.55   | 14                                          | 2      | 0.78     |
|                            | yes      | 12  | 74      | 13     |        | 17                                          | 11     |          |
| Impaired renal function    | no       | 224 | 82      | 3      | 0.68   | 14                                          | 2      | 0.24     |
|                            | yes      | 8   | 88      | 12     |        | 0                                           | 0      |          |
| Mediastinal                | no       | 105 | 82      | 4      | 0.95   | 14                                          | 3      | 0.90     |

|                                          |        |     |    |    |      |    |    |      |
|------------------------------------------|--------|-----|----|----|------|----|----|------|
| tumor with respiratory impairment        | Yes    | 127 | 82 | 3  |      | 13 | 3  |      |
| Vena cava syndrome                       | no     | 200 | 82 | 3  | 0.53 | 15 | 3  | 0.16 |
|                                          | yes    | 32  | 78 | 7  |      | 6  | 4  |      |
| Age (years)                              | <10    | 128 | 82 | 3  | 0.92 | 13 | 3  | 0.49 |
|                                          | ≥10    | 105 | 82 | 4  |      | 15 | 4  |      |
|                                          | <15    | 211 | 82 | 3  | 0.68 | 13 | 2  | 0.27 |
|                                          | ≥15    | 22  | 76 | 10 |      | 24 | 10 |      |
| Gender                                   | male   | 176 | 82 | 3  | 0.58 | 15 | 3  | 0.58 |
|                                          | female | 57  | 81 | 5  |      | 11 | 4  |      |
| age >10                                  | male   | 80  | 82 | 4  | 0.46 | 16 | 4  | 0.98 |
|                                          | female | 25  | 80 | 8  |      | 12 | 7  |      |
| age >15                                  | male   | 18  | 76 | 10 | 0.94 | 24 | 11 | 0.71 |
|                                          | female | 4   | 75 | 22 |      | 25 | 25 |      |
| Corticosteroid administered in phase Ia  | Pred   | 136 | 79 | 3  | 0.16 | 17 | 3  | 0.06 |
|                                          | Dex    | 97  | 85 | 4  |      | 9  | 3  |      |
| Treatment delay                          | ≤34    | 157 | 84 | 3  | 0.36 | 13 | 3  |      |
|                                          | >34    | 60  | 88 | 4  |      | 10 | 4  |      |
| day 8 – the beginning of phase Ib (days) |        |     |    |    |      |    |    | 0.48 |

\*Modified Karnofsky Index.

**Supplement 16. Univariate analyses of prognostic factors in patients with pB-LBL only (presentation of selected variables only).**

|                                                          |         | n      | EFS (%) | SE (%) | p     | cumulative incidence of non-response/relapse | SE (%) | p (gray) (%) |      |
|----------------------------------------------------------|---------|--------|---------|--------|-------|----------------------------------------------|--------|--------------|------|
| Stage                                                    | I       | 11     | 100     | 0      | 0.025 | 0                                            | 0      | 0.26         |      |
|                                                          | II      | 18     | 89      | 7      |       | 6                                            | 6      |              |      |
|                                                          | III     | 20     | 55      | 11     |       | 25                                           | 10     |              |      |
|                                                          | IV      | 14     | 86      | 9      |       | 7                                            | 7      |              |      |
|                                                          | unknown | 3      | 100     | 0      |       | 0                                            | 0      |              |      |
| Bone involvement                                         | no      | 46     | 80      | 6      | 0.81  | 9                                            | 4      | 0.66         |      |
|                                                          | yes     | 20     | 80      | 9      |       | 15                                           | 8      |              |      |
| B-symptoms (any)                                         | no      | 60     | 82      | 5      | 0.46  | 8                                            | 4      | 0.10         |      |
|                                                          | yes     | 6      | 67      | 19     |       | 33                                           | 21     |              |      |
| Performance                                              | 1       | 33     | 79      | 7      | 0.59  | 9                                            | 5      | 0.28         |      |
|                                                          | 2       | 24     | 83      | 8      |       | 13                                           | 7      |              |      |
|                                                          | 3       | 7      | 86      | 13     |       | 0                                            | 0      |              |      |
|                                                          | 4       | 2      | 50      | 35     |       | 50                                           | 50     |              |      |
|                                                          | 5       | 0      |         |        |       |                                              |        |              |      |
| Age (years)                                              | <10     | 44     | 75      | 7      | 0.097 | 14                                           | 5      | 0.19         |      |
|                                                          | ≥10     | 22     | 91      | 6      |       | 5                                            | 5      |              |      |
|                                                          | <15     | 61     | 79      | 5      | 0.26  | 12                                           | 4      | 0.40         |      |
|                                                          | ≥15     | 5      | 100     | 0      |       | 0                                            | 0      |              |      |
| Gender                                                   | male    | 40     | 81      | 6      | 0.80  | 13                                           | 5      | 0.38         |      |
|                                                          | female  | 26     | 80      | 8      |       | 8                                            | 5      |              |      |
|                                                          | age >10 | male   | 13      | 92     | 7     | 0.82                                         | 8      | 8            | 0.41 |
|                                                          |         | female | 9       | 89     | 10    |                                              | 0      | 0            |      |
|                                                          | age >15 | male   | 3       |        |       |                                              | 0      | 0            |      |
|                                                          |         | female | 2       |        |       |                                              | 0      | 0            |      |
| Corticosteroid administered in phase Ia                  | Pred    | 62     | 79      | 5      | 0.31  | 11                                           | 4      | 0.44         |      |
|                                                          | Dex     | 4      | 100     | 0      |       | 0                                            | 0      |              |      |
| Treatment delay day 8 – the beginning of phase Ib (days) | ≤34     | 53     | 83      | 5      | 0.65  | 10                                           | 4      | 0.78         |      |
|                                                          | >34     | 12     | 75      | 13     |       | 8                                            | 8      |              |      |

## **Legends**

Figure 3. Interval from day 8 of induction phase Ia until day 36 (beginning of induction phase Ib) according to the randomization arm.

## **References**

1. Murphy SB. Classification, staging and end results of treatment of childhood non-Hodgkin's lymphomas: dissimilarities from lymphomas in adults. *Semin Oncol.* 1980;7:332-339.
