# Supplementary material for: Results and conclusions of the European Intergroup EURO-LB02 trial in children and adolescents with lymphoblastic lymphoma
Source: PubMed Central journal article supplement — Haematologica. 2017 Oct 5;102(12):2086–96. doi: 10.3324/haematol.2015.139162 (PMC5709108; doi:10.3324/haematol.2015.139162), 2017-12
Supplement: 2015_139162-Disclosures_and_Contributions.pdf [file 2015_139162-Disclosures_and_Contributions.pdf]

Haematologica  
HAEMATOL/2015/139162  
Version 4

Results and conclusions of the European Intergroup EURO-LB02 Trial  
in children and adolescents with lymphoblastic lymphoma

Eva Landmann, Birgit Burkhardt, Martin Zimmermann, Ulrike Meyer,  
Wilhelm Woessmann, Wolfram Klapper, Grazyna Wrobel, Angelo  
Rosolen, Marta Pillon, Gabriele Escherich, Andishe Attarbaschi, Auke  
Beishuizen, Karin Mellgren, Robert Wynn, Richard Ratei, Adriana  
Plesa, Martin Schrappe, Alfred Reiter, Christophe Bergeron, Catherine  
Patte, and Yves Bertrand

Disclosures: This work was supported by the Deutsche Krebshilfe (grants 102595 and 107813) (A.Re.), by PHRC 2003 (national grant) and SFCE(Y.B.), by St. Anna Kinderkrebsforschung (Children's Cancer Research Institute)(A.A.)and by the Kinderkrebsinitiative, Buchholz, Holm-Seppensen (KKI) (W.K.). These sponsors of the study are public or nonprofit organizations that support science in general. They had no role in gathering, analyzing, or interpreting the data. A.A. received support for travel, accommodations or meeting expenses from Jazz Pharmaceuticals. B.B. received support for travel, accommodations or other expenses: (Jazz Pharmaceuticals) and reports that her institution received research support (Hoffmann-LaRoche). Y.B. received support for travel, accommodations and advisory boards from Jazz Pharmaceuticals. W.K. has received research grants and honoraria paid to his institution and not to himself from Roche, Takeda, Janssen, Celgene, Novartis. There has been financial support from Novartis, Medac, and SigmaTau for research projects performed in leukemia trials (M.S.).

Contributions: B.B., M.Z., A.Ro., A.B., R.W., A.Re., C.B., M.S., and C.P. planned the trial. E.L., B.B., U.M., A.A., W.K., G.W., A.Ro., M.P., G.E., A.A., K.M., R.R., A.P., R.W., A.Re., C.B., and Y.B. collected the data. E.L., B.B., M.Z., U.M., W.W., A.A., A.B., A.Re., M.S., and C.P. analyzed the data. A.Re. and E.L. were responsible for writing the first version of the manuscript. B.B., U.M., M.Z., W.W., W.K., G.W., M.P., G.E., A.A., A.B., K.M., R.W., R.R., A.P., M.S., C.B., C.P., and Y.B. were responsible for critical revision of the manuscript for important intellectual content. E.L., B.B., M.Z., U.M., W.W., W.K., G.W., M.P., G.E., A.A., A.B., K.M., R.R., A.P., R.W., A.Re., C.B., C.P., M.S., and Y.B. approved the final version of the manuscript.
